# Supplementary material for: Cognitive Load in Electromagnetic Navigational and Robotic Bronchoscopy for Pulmonary Nodules
Source: PubMed Central journal article supplement — ATS Sch. 2020 Dec 23;2(1):97–107. doi: 10.34197/ats-scholar.2020-0033OC (PMC8043265; doi:10.34197/ats-scholar.2020-0033oc), 2020-12-23
Supplement: ats-scholar.2020-0033OC_kapp_data_supplement.pdf [file ats-scholar.2020-0033OC_kapp_data_supplement.pdf]

**Online Data Supplement**

**Cognitive Load in Electromagnetic Navigational and Robotic Bronchoscopy for Pulmonary Nodules**

Christopher M. Kapp

Jason A. Akulian

Diana H. Yu

Alexander Chen

José Cárdenas-García

Daniela Molena

Anil Vachani

Momen M. Wahidi

Fabien Maldonado

David Fielding

Lonny B. Yarmus

Hans Lee

Supplemental Table 1: Demographics

|                                                                              |                     |
|------------------------------------------------------------------------------|---------------------|
| Gender                                                                       | Male 5    Female 1  |
| Hand dominance                                                               | Right 5    Left 1   |
| Years out of training                                                        | 10.83 (median 10)   |
| Self-Assessment for competency using EMN<br>Scale 1-5 (1=beginner, 5=expert) | 4.83 (median 5)     |
| EMN cases in last 24 months                                                  | 125.83 (median 100) |
